# Supplementary material for: Factors Influencing NICU Nurses' Decision-Making Behaviour Regarding Monitor Alarms During Clinical Changes in High- Risk Neonates: A Multicentre Study
Source: Research Square preprint supplement (doi:10.21203/rs.3.rs-7934021/v1), 2025-12-25
Supplement: Supplementary file 1 [file f0995bc8d4c525922d415983.docx]

**Establishing High-Quality Clinical Annotations for Intelligent Vital Signs Early Warning Systems in High-Risk Neonates**

**(Nursing Edition)**

**Ⅰ. Annotation of Multi-Parameter Vital Signs**

**1) Situations requiring immediate clinical intervention, indicated in red, are as follows:**

1. Oxygen saturation below 88% (term)/85% (preterm) or a decrease of 20% from baseline, accompanied by a heart rate below 100 bpm – mark red

□ Strongly agree □ Agree □ Neither agree nor disagree □ Disagree □ Strongly disagree

2. Oxygen saturation below 88% (term)/85% (preterm) or a 20% decrease from baseline, accompanied by elevated heart rate (above 180 bpm) – mark in red

□ Strongly agree □ Agree □ Undecided □ Disagree □ Strongly disagree

3. Oxygen saturation below 80% (non-cyanotic congenital heart disease), with or without abnormal heart rate, marked in red

□ Strongly agree □ Agree □ Undecided □ Disagree □ Strongly disagree

4. Respiratory rate below 20 breaths per minute or above 100 breaths per minute, marked in red

□ Strongly agree □ Agree □ Undecided □ Disagree □ Strongly disagree

5. Respiratory rate 20–25 breaths/min or 60–100 breaths/min, with oxygen saturation below 85%, marked in red

□ Strongly agree □ Agree □ Undecided □ Disagree □ Strongly disagree

6. Persistent heart rate of 80–100 bpm or persistently above 160 bpm with oxygen saturation decreasing by 20% from baseline or falling below 85%, marked in red

□ Strongly agree □ Agree □ Undecided □ Disagree □ Strongly disagree

7. Heart rate exceeding 160 bpm accompanied by respiratory rate exceeding 60 breaths per minute, with oxygen saturation decreasing by 20% from baseline or falling below 85%, marked in red

□ Strongly agree □ Agree □ Undecided □ Disagree □ Strongly disagree

1. Continuous arterial blood pressure monitoring: Mark in red if systolic pressure in term infants is below 40 mmHg or above 100 mmHg, or if systolic pressure is below 2 standard deviations from the normal blood pressure for age, or if mean pressure is below the 5th percentile for normal blood pressure in infants of the same age, or if mean pressure is below the expected level for gestational age.

□ Strongly agree □ Agree □ Undecided □ Disagree □ Strongly disagree

9. Systolic blood pressure in term infants between 40-50 mmHg or 90-100 mmHg, accompanied by tachycardia ≥180 bpm or bradycardia ≤100 bpm, marked in red

□ Strongly agree □ Agree □ Undecided □ Disagree □ Strongly disagree

10. Systolic blood pressure in term infants: 40–50 mmHg or 90–100 mmHg, accompanied by a decrease in oxygen saturation below 85%, marked in red

□ Strongly agree □ Agree □ Neither agree nor disagree □ Disagree □ Strongly disagree

**2)Close observation is required, specifically in the following situations marked in yellow:**

11. Oxygen saturation below 88% (term)/85% (preterm) or a 10% decrease from baseline without accompanying heart rate changes, marked yellow

□ Strongly agree □ Agree □ Undecided □ Disagree □ Strongly disagree

12. Persistent heart rate of 80–100/160–180 bpm without abnormal oxygen saturation, marked yellow

□ Strongly agree □ Agree □ Undecided □ Disagree □ Strongly disagree

13. Oxygen saturation below 88% (term)/85% (preterm) or a 10% decrease from baseline, without requiring bag-valve mask ventilation (suctioning, positioning therapy, etc. permitted), marked yellow

□ Strongly agree □ Agree □ Undecided □ Disagree □ Strongly disagree

14. Transient desaturation to 88% (term)/85% (preterm) or approximately 10% below baseline with rapid recovery, occurring frequently. Mark yellow.

□ Strongly agree □ Agree □ Undecided □ Disagree □ Strongly disagree

15. Heart rate exceeding 200 bpm during crying episodes, marked in yellow

□ Strongly agree □ Agree □ Not sure □ Disagree □ Strongly disagree

16. Heart rate below 200 bpm during crying episodes, accompanied by changes in oxygen saturation, marked in yellow

□ Strongly agree □ Agree □ Undecided □ Disagree □ Strongly disagree

17. During treatment or nursing procedures, changes in blood oxygen saturation, blood pressure, or heart rate readings occur; these gradually recover spontaneously after cessation of the procedure. Mark yellow.

□ Strongly agree □ Agree □ Not sure □ Disagree □ Strongly disagree

18. Systolic blood pressure in term infants of 40–50 mmHg or 90–100 mmHg without accompanying heart rate or oxygen saturation abnormalities, marked in yellow

□ Strongly agree □ Agree □ Undecided □ Disagree □ Strongly disagree

**3) Alarms are present but the patient's condition is stable and requires no intervention; such cases are marked green as follows:**

19. Heart rate exceeding 200 bpm during crying episodes without accompanying changes in oxygen saturation, marked green

□ Strongly agree □ Agree □ Undecided □ Disagree □ Strongly disagree

20. Transient desaturation to 88% (term)/85% (preterm) or approximately 10% below baseline with rapid recovery, marked green

□ Strongly agree □ Agree □ Undecided □ Disagree □ Strongly disagree

21. Transient changes in blood oxygen saturation, blood pressure, or heart rate readings during medical procedures, nursing interventions, or feeding, with rapid spontaneous recovery upon cessation of the intervention. Marked green.

□ Strongly agree □ Agree □ Undecided □ Disagree □ Strongly disagree

22. Systolic pressure within two standard deviations of the normal range for age, with mean pressure above the 5th percentile for age or gestational age plus five, without abnormal heart rate or oxygen saturation. Marked green.

□ Strongly agree □ Agree □ Neither agree nor disagree □ Disagree □ Strongly disagree

23. Oxygen saturation ≥95% (term) or ≥90% (preterm), heart rate 100–160 bpm, respiratory rate 25–60 breaths/min, systolic blood pressure within ±2 standard deviations of normal for age, mean pressure ≥5th percentile for age or ≥gestational age +5. Default green.

□ Strongly agree □ Agree □ Undecided □ Disagree □ Strongly disagree

**Ⅱ: Annotation of the incident**

**1) Situations requiring immediate clinical intervention, indicated in red, are as follows:**

24. Cases requiring endotracheal intubation and mechanical ventilation following clinical assessment shall be marked red 30 minutes prior to initiation of ventilation.

□ Strongly agree □ Agree □ Undecided □ Disagree □ Strongly disagree

25. During episodes of arrhythmia, specifically including pre-excitation syndrome, supraventricular tachycardia, ventricular tachycardia, and ventricular fibrillation, mark in red

□ Strongly agree □ Agree □ Undecided □ Disagree □ Strongly disagree

1. Periods of seizure activity, including clinical and electrocardiographic episodes, marked in red

□ Strongly agree □ Agree □ Undecided □ Disagree □ Strongly disagree

27. Periods of shock, marked in red

□ Strongly agree □ Agree □ Undecided □ Disagree □ Strongly disagree

28. Periods without PPHN treatment, marked in red

□ Strongly agree □ Agree □ Undecided □ Disagree □ Strongly disagree

29. Periods of metabolic disturbance, including blood glucose below 2.2 mmol/L, serum sodium below 125 mmol/L or above 150 mmol/L, serum potassium above 6.5 mmol/L or below 3 mmol/L, or anuria lasting over 6 hours, require urgent intervention and should be marked in red.

□ Strongly agree □ Agree □ Neither agree nor disagree □ Disagree □ Strongly disagree

1. **Close observation is required, specifically in the following situations marked in yellow:**

30. Patients on mechanical ventilation via endotracheal tube should be marked yellow during the ventilation period.

□ Strongly agree □ Agree □ Undecided □ Disagree □ Strongly disagree

31. During episodes of arrhythmia, specifically including intermittent atrial premature beats, intermittent ventricular premature beats, and QT interval prolongation, mark yellow

□ Strongly agree □ Agree □ Not sure □ Disagree □ Strongly disagree

32. Period of drug control following a seizure episode, marked in yellow

□ Strongly agree □ Agree □ Undecided □ Disagree □ Strongly disagree

33. Period of vasoactive drug use following correction of shock state, marked in yellow

□ Strongly agree □ Agree □ Undecided □ Disagree □ Strongly disagree

34. Period of nitric oxide (NO) administration following PPHN onset, highlighted in yellow

□ Strongly agree □ Agree □ Undecided □ Disagree □ Strongly disagree

35. Period of metabolic disturbance, including blood glucose 2.2–2.6 mmol/L, serum sodium 125–130 mmol/L or 145–150 mmol/L, serum potassium 6–6.5 mmol/L or <3–3.5 mmol/L, and oliguria lasting over 6 hours, requiring routine intervention. Mark in yellow.

□ Strongly agree □ Agree □ Undecided □ Disagree □ Strongly disagree

**3) Alarms are present but the patient's condition is stable and requires no intervention; such cases are marked green as follows:**

36. All cases not marked above may be defaulted to green.

□ Strongly agree □ Agree □ Undecided □ Disagree □ Strongly disagree

**Ⅲ: Additional question:**

1. When the monitor alarms, do nurses assess the patient's condition?

□ Yes □ No

1. Does frequent monitoring alarm reduce nurses' observation of patients' conditions?

□ Yes □ No

3. Does frequent monitoring device alarms reduce nurses' attention to monitoring device alarms?

□ Yes □ No

1. Does frequent monitoring device alarms reduce nurses' prompt response to monitoring alarms

□ Yes □ No
